# Supplementary material
Source: MDPI journal article supplement (https://www.mdpi.com/2073-445X/10/11/1241)
Supplement: s1 [file s1]

## Supplementary information

Table S1. Concentration of Hg in peatlands in China

| Location                                     | Concentration of Hg ( $\mu\text{g kg}^{-1}$ ) |        |                   | Period    | References         |
|----------------------------------------------|-----------------------------------------------|--------|-------------------|-----------|--------------------|
|                                              | min                                           | max    | ave               |           |                    |
| Zoige                                        | 7.30                                          | 32.13  | 18.51             | 1824-2011 | This study         |
| Wuliangsuhai in Inner Mongolia*              | 0.55                                          | 35.94  | 4.35              | 1883-2012 | (Zhang 2013)       |
| Hongyuan                                     | 16.7                                          | 100    | ND                | 1840-2006 | (Shi et al. 2011)  |
| Tanghongling in the Lesser Khingan Mountains | 174.4                                         | 574.4  | 399.1 $\pm$ 136.7 | 1880-1970 | (Tang et al. 2012) |
| The Greater Khingan Mountains*               | 4.10                                          | 335.84 | 154.73            | 1874-2003 | (Bao et al. 2016)  |
|                                              | 9.41                                          | 313.59 | 77.77             | 1839-2007 |                    |
|                                              | 7.10                                          | 163.87 | 146.12            | 1819-2005 |                    |

\*Part of the data were calculated by GetData 2.20. ND: no data. Ave: average.

Table S2. Recent accumulation rate (AR) of total Hg in peatlands in China

| Location                                     | Average recent Hg AR ( $\mu\text{g m}^{-2} \text{ year}^{-1}$ ) |        |                 | Period    | References         |
|----------------------------------------------|-----------------------------------------------------------------|--------|-----------------|-----------|--------------------|
|                                              | min                                                             | max    | ave             |           |                    |
| Zoige                                        | 3.46                                                            | 34.37  | 18.24           | 1824-2011 | This study         |
| Tanghongling in the Lesser Khingan Mountains | 10.04                                                           | 27.43  | 15.43           | 300 aB.P- | (Xu 2010)          |
| Tanghongling in the Lesser Khingan Mountains | 33.1                                                            | 112.4  | 74.6 $\pm$ 13.1 | 1880-1970 | (Tang et al. 2012) |
| The Greater Khingan Mountains*               | 40.78                                                           | 307.45 | 122.52          | 1874-2003 | (Bao et al. 2016)  |
|                                              | 13.62                                                           | 246.3  | 109.29          | 1839-2007 |                    |
|                                              | 2.39                                                            | 94.81  | 41.38           | 1819-2005 |                    |

\* Part of the data were calculated by GetData 2.20. ND: no data. Ave: average.

Table S3. Concentration of total As in peatlands in China

| Location                        | Concentration of As ( $\mu\text{g kg}^{-1}$ ) |         |         | Period    | References   |
|---------------------------------|-----------------------------------------------|---------|---------|-----------|--------------|
|                                 | min                                           | max     | ave     |           |              |
| Zoige                           | 86.38                                         | 174.21  | 174.21  | 1824-2011 | This study   |
| Wuliangsuhai in Inner Mongolia* | 710.04                                        | 1907.96 | 1219.54 | 1883-2012 | (Zhang 2013) |

\*Part of the data were calculated by GetData 2.20. Ave: average.

Table S4. TN, TC, and TOC of every 1-cm soil layer along peat profile with triplicate samples.

| Soil layer (cm) | Sample number | TN (mg g <sup>-1</sup> ) | TC (mg g <sup>-1</sup> ) | TOC (mg g <sup>-1</sup> ) | Soil layer (cm) | Sample number | TN (mg g <sup>-1</sup> ) | TC (mg g <sup>-1</sup> ) | TOC (mg g <sup>-1</sup> ) |
|-----------------|---------------|--------------------------|--------------------------|---------------------------|-----------------|---------------|--------------------------|--------------------------|---------------------------|
| 1               | 1-1           | 11.646                   | 167.635                  | 70.243                    | 14              | 14-2          | 11.284                   | 166.674                  | 79.851                    |
| 1               | 1-2           | 11.018                   | 164.085                  | 77.607                    | 14              | 14-3          | 11.201                   | 165.861                  | 94.719                    |
| 1               | 1-3           | 11.625                   | 160.498                  | 72.505                    | 15              | 15-1          | 11.473                   | 165.695                  | 98.244                    |
| 2               | 2-1           | 11.797                   | 161.192                  | 82.598                    | 15              | 15-2          | 11.620                   | 165.217                  | 100.370                   |
| 2               | 2-2           | 10.717                   | 145.827                  | 76.163                    | 15              | 15-3          | 11.282                   | 168.009                  | 85.223                    |
| 2               | 2-3           | 11.686                   | 161.141                  | 73.274                    | 16              | 16-1          | 11.568                   | 167.357                  | 89.592                    |
| 3               | 3-1           | 11.437                   | 160.040                  | 78.537                    | 16              | 16-2          | 11.457                   | 166.985                  | 90.296                    |
| 3               | 3-2           | 11.984                   | 161.180                  | 95.899                    | 16              | 16-3          | 11.838                   | 170.296                  | 58.569                    |
| 3               | 3-3           | 12.126                   | 163.578                  | 90.328                    | 17              | 17-1          | 12.476                   | 170.915                  | 95.239                    |
| 4               | 4-1           | 12.034                   | 162.304                  | 104.209                   | 17              | 17-2          | 11.607                   | 170.719                  | 90.880                    |
| 4               | 4-2           | 12.057                   | 162.517                  | 86.860                    | 17              | 17-3          | 11.348                   | 168.344                  | 90.223                    |
| 4               | 4-3           | 12.762                   | 170.357                  | 107.263                   | 18              | 18-1          | 11.239                   | 167.819                  | 86.111                    |
| 5               | 5-1           | 12.813                   | 170.822                  | 83.102                    | 18              | 18-2          | 11.313                   | 167.806                  | 88.721                    |
| 5               | 5-2           | 12.223                   | 170.529                  | 93.665                    | 18              | 18-3          | 11.776                   | 168.414                  | 84.108                    |
| 5               | 5-3           | 11.898                   | 166.616                  | 104.835                   | 19              | 19-1          | 11.132                   | 166.450                  | 124.102                   |
| 6               | 6-1           | 11.788                   | 166.217                  | 87.149                    | 19              | 19-2          | 11.681                   | 166.800                  | 114.913                   |
| 6               | 6-2           | 12.101                   | 165.908                  | 47.394                    | 19              | 19-3          | 12.985                   | 207.593                  | 116.084                   |
| 6               | 6-3           | 12.075                   | 163.721                  | 89.569                    | 20              | 20-1          | 13.416                   | 209.443                  | 81.508                    |
| 7               | 7-1           | 12.271                   | 163.698                  | 96.219                    | 20              | 20-2          | 12.640                   | 204.824                  | 80.835                    |
| 7               | 7-2           | 12.305                   | 163.837                  | 95.796                    | 20              | 20-3          | 11.362                   | 162.995                  | 79.069                    |
| 7               | 7-3           | 11.842                   | 168.133                  | 93.994                    | 21              | 21-1          | 10.985                   | 162.547                  | 75.604                    |
| 8               | 8-1           | 12.071                   | 168.006                  | 100.491                   | 21              | 21-2          | 11.106                   | 161.797                  | 73.942                    |
| 8               | 8-2           | 12.255                   | 168.339                  | 92.530                    | 21              | 21-3          | 9.337                    | 144.502                  | 79.703                    |
| 8               | 8-3           | 12.156                   | 169.293                  | 89.159                    | 22              | 22-1          | 9.502                    | 143.534                  | 62.026                    |
| 9               | 9-1           | 11.826                   | 169.328                  | 99.689                    | 22              | 22-2          | 9.659                    | 144.039                  | 68.381                    |
| 9               | 9-2           | 12.482                   | 168.060                  | 72.714                    | 22              | 22-3          | 8.324                    | 127.495                  | 107.246                   |
| 9               | 9-3           | 12.038                   | 163.774                  | 104.308                   | 23              | 23-1          | 8.371                    | 127.397                  | 57.247                    |
| 10              | 10-1          | 11.362                   | 163.486                  | 87.610                    | 23              | 23-2          | 8.345                    | 127.625                  | 49.565                    |
| 10              | 10-2          | 11.673                   | 163.505                  | 85.847                    | 23              | 23-3          | 7.571                    | 121.518                  | 56.510                    |
| 10              | 10-3          | 12.133                   | 168.434                  | 87.070                    | 24              | 24-1          | 7.710                    | 121.165                  | 55.299                    |
| 11              | 11-1          | 11.744                   | 168.853                  | 99.230                    | 24              | 24-2          | 7.770                    | 120.941                  | 60.598                    |
| 11              | 11-2          | 12.499                   | 169.362                  | 103.718                   | 24              | 24-3          | 7.728                    | 122.720                  | 58.846                    |
| 11              | 11-3          | 12.454                   | 172.086                  | 101.382                   | 25              | 25-1          | 8.271                    | 123.114                  | 66.321                    |
| 12              | 12-1          | 12.218                   | 171.311                  | 138.459                   | 25              | 25-2          | 7.813                    | 123.110                  | 68.592                    |
| 12              | 12-2          | 12.045                   | 172.074                  | 152.097                   | 25              | 25-3          | 7.638                    | 121.310                  | 62.939                    |
| 12              | 12-3          | 12.647                   | 178.890                  | 137.771                   | 26              | 26-1          | 7.716                    | 121.462                  | 69.797                    |
| 13              | 13-1          | 12.282                   | 177.738                  | 82.354                    | 26              | 26-2          | 7.732                    | 121.473                  | 43.204                    |
| 13              | 13-2          | 12.772                   | 178.192                  | 86.022                    | 26              | 26-3          | 7.761                    | 121.800                  | 72.598                    |
| 13              | 13-3          | 11.455                   | 168.431                  | 75.930                    | 27              | 27-1          | 7.560                    | 122.360                  | 61.557                    |
| 14              | 14-1          | 11.454                   | 167.247                  | 92.329                    | 27              | 27-2          | 7.504                    | 121.522                  | 68.144                    |

Continued Table S4

|    |      |       |         |        |
|----|------|-------|---------|--------|
| 27 | 27-3 | 7.621 | 119.362 | 62.451 |
| 28 | 28-1 | 7.580 | 117.985 | 70.166 |
| 28 | 28-2 | 7.488 | 119.229 | 63.954 |
| 28 | 28-3 | 7.615 | 121.025 | 67.721 |
| 29 | 29-1 | 8.103 | 121.376 | 61.088 |
| 29 | 29-2 | 7.783 | 121.461 | 61.778 |
| 29 | 29-3 | 8.154 | 124.803 | 58.369 |
| 30 | 30-1 | 8.077 | 125.014 | 60.027 |
| 30 | 30-2 | 8.158 | 124.975 | 65.831 |
| 30 | 30-3 | 8.014 | 127.571 | 64.060 |

Note: TN, TC, and TOC are the abbreviations of total nitrogen content, total carbon content, and total organic carbon content, respectively.

Table S5  $^{210}\text{Pb}$  radioactivity specific activity degree along depth and mass depth. Chronology and sedimentation flux were determined by CRS model.

| Depth<br>(cm) | Mass depth<br>(g cm <sup>-2</sup> ) | Age<br>(a) | Sedimentation flux<br>(g cm <sup>-2</sup> yr <sup>-1</sup> ) | Depth<br>(cm) | Mass depth<br>(g cm <sup>-2</sup> ) | Age<br>(a) | Sedimentation flux<br>(g cm <sup>-2</sup> yr <sup>-1</sup> ) |
|---------------|-------------------------------------|------------|--------------------------------------------------------------|---------------|-------------------------------------|------------|--------------------------------------------------------------|
| 1             | 0.247                               | 2011       | 0.093                                                        | 16            | 4.154                               | 1975       | 0.105                                                        |
| 2             | 0.489                               | 2009       | 0.090                                                        | 17            | 4.447                               | 1971       | 0.103                                                        |
| 3             | 0.732                               | 2007       | 0.106                                                        | 18            | 4.737                               | 1969       | 0.104                                                        |
| 4             | 0.977                               | 2004       | 0.102                                                        | 19            | 5.031                               | 1965       | 0.102                                                        |
| 5             | 1.219                               | 2002       | 0.099                                                        | 20            | 5.323                               | 1960       | 0.098                                                        |
| 6             | 1.468                               | 2000       | 0.105                                                        | 21            | 5.618                               | 1956       | 0.096                                                        |
| 7             | 1.720                               | 1997       | 0.102                                                        | 22            | 5.918                               | 1953       | 0.097                                                        |
| 8             | 1.967                               | 1996       | 0.107                                                        | 23            | 6.219                               | 1949       | 0.095                                                        |
| 9             | 2.229                               | 1994       | 0.112                                                        | 24            | 6.522                               | 1943       | 0.092                                                        |
| 10            | 2.495                               | 1990       | 0.105                                                        | 25            | 6.823                               | 1927       | 0.078                                                        |
| 11            | 2.762                               | 1989       | 0.109                                                        | 26            | 7.126                               | 1921       | 0.077                                                        |
| 12            | 3.034                               | 1986       | 0.109                                                        | 27            | 7.428                               | 1912       | 0.073                                                        |
| 13            | 3.308                               | 1984       | 0.112                                                        | 28            | 7.733                               | 1889       | 0.062                                                        |
| 14            | 3.585                               | 1982       | 0.112                                                        | 29            | 8.042                               | 1865       | 0.054                                                        |
| 15            | 3.867                               | 1976       | 0.102                                                        | 30            | 8.352                               | 1824       | 0.044                                                        |

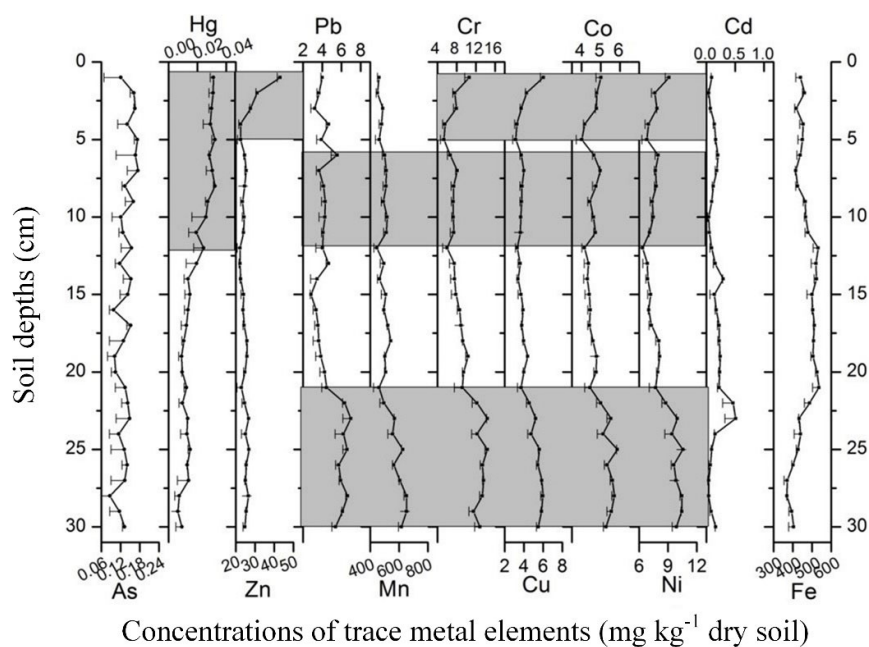

Figure S1. Main trace metal elements concentrations along peat profile. Note different scales of x-axis of different elements. All elements were determined by model Z-2000 flame graphite furnace atomic absorption spectrometer AAS, Hitachi LTD, Japan. The pretreatment of samples was similar to that in Pb and As determination. The recoveries of standard samples for these elements were all within 90%–110%.

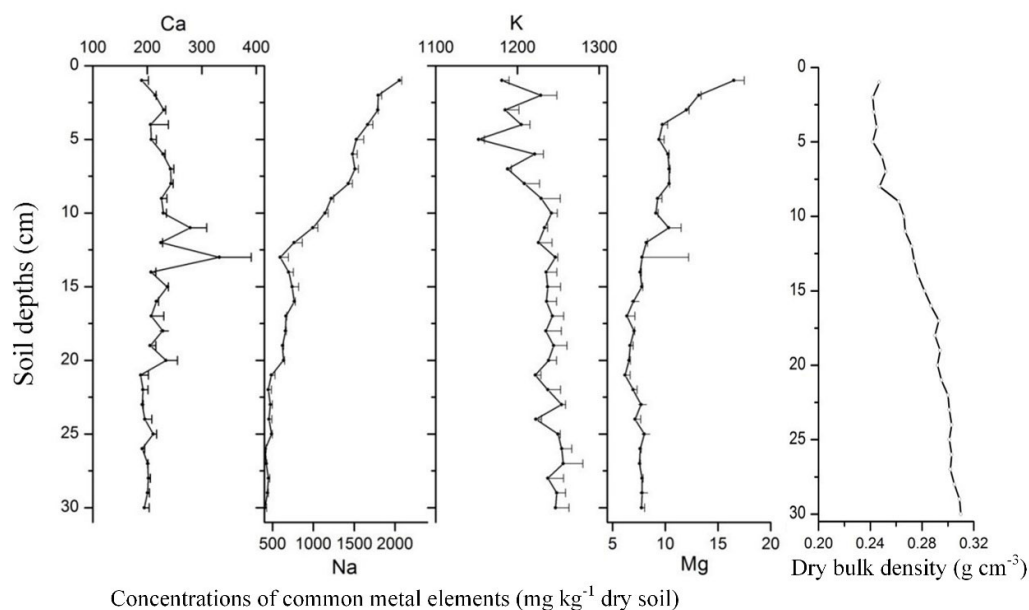

Figure S2. Main trace metal elements concentrations and dry bulk density along peat profile. Note different scales of x-axis of different elements.
